1 ***MSI/MMD1* homologs in the moss *P. patens* are required for male and**  
2 **female gametogenesis and likely for sporogenesis.**

3 Katarina Landberg<sup>1\*</sup>, Mauricio Lopez-Obando<sup>1,2\*</sup>, Victoria Sanchez Vera<sup>1,3</sup>, Eva Sundberg<sup>1</sup>,  
4 Mattias Thelander<sup>1#</sup>

5

6 \*Shared first authors

7

8 <sup>1</sup>Department of Plant Biology, Swedish University of Agricultural Sciences, The Linnean  
9 Centre of Plant Biology in Uppsala, PO Box 7080, SE-75007 Uppsala, Sweden

10 <sup>2</sup>Present address: VEDAS Corporación de Investigación e Innovación (VEDASCI), Cl 8 B  
11 65-261 050024, Medellín, Colombia

12 <sup>3</sup>Present address: Instituto de Hortofruticultura Subtropical y Mediterránea (IHSM),  
13 Departamento de Biología Molecular y Bioquímica, Universidad de Málaga-Consejo Superior  
14 de Investigaciones Científicas, Av. Louis Pasteur, 49 29010 Málaga, Spain.

15

16 #Correspondence: Mattias Thelander (+46 18 673236; [Mattias.Thelander@slu.se](mailto:Mattias.Thelander@slu.se))

17

18 **ORCID numbers**

19 Katarina Landberg: 0000-0002-2945-8571

20 Mauricio Lopez-Obando: 0000-0002-1380-0643

21 Victoria Sanchez Vera: 0000-0001-8615-5270

22 Eva Sundberg: 0000-0003-4228-434X

23 Mattias Thelander: 0000-0002-6663-7405

|                                                                                                |      |                                      |                                                                            |
|------------------------------------------------------------------------------------------------|------|--------------------------------------|----------------------------------------------------------------------------|
| Total word count (excluding summary, key words, author contributions, references and legends): | 6218 | No. of Figures:                      | 4 (all in color)                                                           |
| Summary:                                                                                       | 169  | No. of Tables:                       | 1                                                                          |
| Introduction:                                                                                  | 840  | No. of Supporting Information files: | 1 Word file with 9 items (Fig. S1-S6; Table S1-S3) 1 Excel-file (Table S4) |
| Materials and Methods:                                                                         | 1792 |                                      |                                                                            |
| Results:                                                                                       | 2329 |                                      |                                                                            |
| Discussion:                                                                                    | 1251 |                                      |                                                                            |
| Acknowledgements:                                                                              | 41   |                                      |                                                                            |

24

## 25 **Summary**

- 26 • The Arabidopsis Plant HomeoDomain (PHD) proteins AtMS1 and AtMMD1 provide  
27 chromatin-mediated transcriptional regulation essential for tapetum-dependent pollen  
28 formation. Such pollen-based male gametogenesis is a derived trait of seed plants. Male  
29 gametogenesis in the common ancestors of land plants is instead likely to have been  
30 reminiscent of that in extant bryophytes where flagellated sperms are produced by an  
31 elaborate gametophyte generation. Still, also bryophytes possess MS1/MMD1-related  
32 PHD proteins.
- 33 • We addressed the function of two MS1/MMD1-homologs in the bryophyte model moss  
34 *Physcomitrium patens* by the generation and analysis of reporter and loss-of-function  
35 lines.
- 36 • The two genes are together essential for both male and female fertility by providing cell  
37 autonomous functions in the gamete-producing inner cells of antheridia and archegonia.  
38 They are furthermore expressed in the diploid sporophyte generation suggesting a function  
39 during sporogenesis, a process proposed related by descent to pollen formation in  
40 angiosperms.
- 41 • We propose that the moss MS1/MMD1-related regulatory network required for  
42 completion of male and female gametogenesis and possibly for sporogenesis, represent a  
43 heritage from ancestral land plants.

44

## 45 **Key words**

46 Bryophyte, PHD protein, *Physcomitrium patens*, Pollen, Reproductive development, Spore,  
47 Sporogenesis, Tapetum

## 48 Introduction

49 The Plant HomeoDomain (PHD) motif defines a family of proteins that can recognize and  
50 bind histones depending on covalent modification status of the histone tails (Mouriz et al.,  
51 2015). By recruitment and regulation of chromatin remodeling factors and transcriptional  
52 regulators, PHD proteins can thereby control chromatin compaction and gene expression in a  
53 histone modification-governed manner.

54 Phylogenetic analysis places angiosperm PHD proteins into five main subfamilies and a  
55 number of clades (Cao *et al.*, 2018). Among these, clade IIa comprises members from both  
56 mono- and dicotyledonous species including the Arabidopsis genes *MALE STERILITY 1*  
57 (*AtMS1*) and *MALE MEIOCYTE DEATH 1* (*AtMMD1*). *AtMS1* and *AtMMD1* encode similar  
58 protein products which are both essential for pollen production in anthers. Still, the two genes  
59 exert their functions in distinct anther cell types. Thus, *AtMMD1* controls gene expression and  
60 chromosome condensation needed for completion of meiosis in microsporocytes (Reddy *et al.*  
61 *et al.*, 2003; Yang *et al.*, 2003) while *AtMS1* controls gene expression and function of tapetal  
62 cells surrounding and nursing the microsporocytes and microspores on their route towards  
63 functional pollen (Wilson *et al.*, 2001; Ito and Shinozaki, 2002; Alves-Ferreira *et al.*, 2007;  
64 Yang *et al.*, 2007; Reimegård *et al.*, 2017; Lu *et al.*, 2020). Both genes exert their functions  
65 through modification of chromatin structure. Thus, *AtMS1* activates genes organized in  
66 clusters by relaxation of chromatin condensation (Reimegård *et al.*, 2017) and *AtMMD1* can  
67 bind histone tails in a modification-dependent manner (Andreuzza *et al.*, 2015; Wang *et al.*,  
68 2016). A detailed mode of action was recently proposed for *AtMMD1* in meiotic cells where  
69 the protein is recruited to H3K4me3 marks allowing it to modulate the target specificity of  
70 nearby JUMONJI 16 (JMJ16) histone demethylases through a physical interaction dependent  
71 on its central MMD domain (Wang *et al.*, 2020).

72 The developmental process controlled by *AtMS1* and *AtMMD1*, i.e. tapetum-assisted  
73 microspore and pollen formation facilitating downstream male gametogenesis, is a derived  
74 trait of angiosperms (Hackenberg & Twell, 2019). Gametogenesis in the common ancestors of  
75 all extant land plants is instead likely to have been reminiscent of that in bryophytes of today,  
76 where eggs and flagellated sperms are produced by female archegonia and male antheridia  
77 formed by a dominant haploid gametophyte generation (Renzaglia *et al.*, 2000; Hackenberg &  
78 Twell, 2019). These gametophytic reproductive organs were eventually lost from the  
79 angiosperm lineage as part of a drastic reduction of the haploid gametophyte generation

80 accompanied by increased complexity of the diploid sporophyte generation (Harrison, 2017).  
81 As part of this transition, pollen is hypothesized to have evolved from walled spores  
82 reminiscent of those in extant bryophytes thanks to two key evolutionary adaptations  
83 (Hackenberg and Twell, 2019). First, divisions in the male gametophyte generation were  
84 almost completely abolished to arrive at the situation in present-day angiosperms where only  
85 two sequential specialized divisions produce a pair of male gametes inside a vegetative cell  
86 from the primary meiotic product (the microspore). Second, breakage of the spore wall was  
87 deferred so that the cell divisions producing the two gametes could be completed within a still  
88 intact wall, today recognized as the angiosperm pollen wall. The proposed evolutionary origin  
89 of pollen gives that tapetum-derived pollen production in angiosperms is related by descent to  
90 tapetum-dependent spore formation in bryophytes (Lopez-Obando *et al.*, 2022).

91 The existence of PHD clade IIa homologs also in gametophyte dominant bryophytes (Higo *et al.*  
92 *et al.*, 2016; Sanchez-Vera *et al.*, 2022), separated from angiosperms for about 450 million years  
93 (Morris *et al.*, 2018), suggest that clade IIa-related genes were present already in the common  
94 ancestors of all extant land plants. Recent transcriptome data from the bryophyte model moss  
95 *Physcomitrium patens* reports the expression of two clade IIa homologs in sporophytes at  
96 stages during which tapetal-like cells are active and spores and their precursors develop  
97 (Perroud *et al.*, 2018; Lopez-Obando *et al.*, 2022). Moreover, expression of the two genes was  
98 also detected in antheridia (male reproductive organs) and in the egg cell in archegonia  
99 (female reproductive organs), both produced by the haploid gametophytic generation  
100 (Meyberg *et al.*, 2020; Sanchez-Vera *et al.*, 2022 and references therein). Similarly, a putative  
101 clade IIa homologue of the model liverwort *Marchantia polymorpha* is also active in  
102 reproductive organs, at least in the antheridia (Higo *et al.*, 2016). This points towards a  
103 function for bryophyte clade IIa genes during gametogenesis. Further dissection of this  
104 function may add to our understanding about the mechanisms, regulation and evolution of  
105 gametogenesis in land plants (Berger and Twell, 2011; Hisanaga *et al.*, 2019).

106 Here we describe the functional characterization of the clade IIa PHD homologs *PpMSIA* and  
107 *PpMSIB* in the moss *P. patens*. *PpMSIA* and *PpMSIB* are together required for male and  
108 female fertility by providing cell autonomous functions essential for development of the  
109 gamete-producing inner cells of both antheridia and archegonia. The expression domains of  
110 the two genes furthermore suggest functions in sporogenous cells and in foot transfer cells of  
111 the diploid sporophyte generation. Based on these findings, we discuss a possible ancestral

112 function for clade II PHD proteins and elaborate on how this may have evolved into the  
113 functions evident in present-day bryophytes and angiosperms, respectively.

## 114 **Materials and methods**

### 115 **Plant material, growth conditions, tissue harvest, transformation and crosses**

116 *Physcomitrium patens* (previously *Physcomitrella patens*) ecotype Reute (R) (Hiss *et al.*,  
117 2017) was used as WT and is the background to all transgenic lines in this study. Protonemal  
118 moss tissue was grown aseptically on solid BCD medium (Thelander *et al.*, 2007)  
119 supplemented with 5 mM Ammonium Tartrate and 0.8% agar in petri dishes at 25°C under  
120 constant white light from fluorescent tubes (Philips F25T8/TL741, [www.lighting.philips.com](http://www.lighting.philips.com))  
121 at 35  $\mu\text{mol m}^{-2}\text{s}^{-1}$  in a Percival Scientific CU-41L4 growth chamber ([www.percival-](http://www.percival-scientific.com)  
122 [scientific.com](http://www.percival-scientific.com)). To induce reproductive organs and subsequent sporophyte development,  
123 young chloronemal tissue was shaped into round balls and placed on solid BCD medium in 15  
124 mm deep petri dishes (90 mm in diameter). The ball-shaped tissue was allowed to grow out  
125 into gametophore-containing colonies for 5-6 weeks where after the plates were transferred to  
126 SD conditions (8 h of light, 30  $\mu\text{mol m}^{-2}\text{s}^{-1}$ ) at 15° C in a Sanyo MLR-350 light chamber to  
127 induce reproductive development. To enhance fertilization the plants were submerged in  
128 water overnight at 20±1 dpi. Crosses were carried out as described in Thelander *et al.* (2019)  
129 and the *P. patens* ecotype Gransden was used as a WT line with strongly reduced male  
130 fertility. For expression and phenotype analysis, gametophyte shoots harboring either  
131 reproductive organs or a developing sporophyte in the apex were harvested from the periphery  
132 of moss colonies at indicated time points. Under a Leica MZ16 stereo microscope (Leica  
133 Biosystems, Heidelberg, Germany), all leaves were removed to expose the antheridia and  
134 archegonia. For sporophyte analysis also residual reproductive organs were detached, as were  
135 the sporophyte calyptra from stage 8. To enhance penetration, sporangia harvested after 12  
136 dpw were punctuated using a fine needle. Protoplast transformation was carried out as  
137 previously described (Schaefer *et al.*, 1991). Stable transformants were selected in the  
138 presence of 50  $\mu\text{gml}^{-1}$  hygromycin (Duchefa H0192; Haarlem, the Netherlands) or G418  
139 (11811023; Thermo Fisher Scientific, Waltham, MA, USA).

### 140 **Generation of reporter lines**

141 Primer sequences are shown in Table S1. The *PpMS1A* translational reporter construct  
142 pMLO14 (Fig. S1a), used to integrate a GFP-GUS gene in frame near the end of the coding

143 sequence was generated by the fusion of four PCR fragments using In-Fusion technology  
144 (www.takarabio.com): A 4550 bp vector fragment amplified with primers SS748/SS749 from  
145 plasmid pDEST14 (www.thermofisher.com), a fragment covering 669 bp from exon 3 to near  
146 the end of the *PpMSIA* CDS amplified with primers SS750/SS751 from WT gDNA, a  
147 fragment covering a 2556 bp GFP-GUS gene amplified with primers SS752/SS753 from  
148 plasmid pMT211 (Thelander *et al.*, 2019), and a fragment covering 651 bp of the extreme end  
149 of the CDS and the 3'UTR of *PpMSIA* amplified with primers SS754/SS755 from WT  
150 gDNA. To generate the *PpMSIApro::PpMSIA-GFPGUS* reporter lines, 8 µg of pMLO14 and  
151 4 µg of pMLO13 were co-transformed into WT protoplast together with 8 µg pACT1:hCAS9  
152 and 4 µg of pBNRF (Lopez-Obando *et al.*, 2016). Stable transformants were selected on  
153 G418, where after the in frame-fusion between the *PpMSIA* CDS and the GFP-GUS gene  
154 resulting from correct integration was confirmed by PCR amplification using the primers  
155 SS756/SS627 followed by sequencing of the resulting PCR product with the primers SS757  
156 and SS627. Three independent lines showing correct integration were selected for  
157 downstream analysis (Table S2). The three lines indicated qualitatively similar signal patterns,  
158 but while signals in *PpMSIApro::PpMSIA-GFPGUS-1* were strong and coherent in both  
159 reproductive organs and sporophytes, signals in *PpMSIApro::PpMSIA-GFPGUS-2* and -3  
160 were generally weaker, and, as a consequence of this, challenging to detect in reproductive  
161 organs.

162 To produce the *PpMSIB* transcriptional reporter construct pVS1 (Fig. S1b), the *PpMSIB*  
163 promoter was amplified from gDNA with primers SS738/SS739, trimmed to 2918 bp with  
164 *Bam*HI/*Nco*I, and cloned between the same sites of the vector pMT211. The vector pMT211  
165 carries a hygromycin selection cassette and allows promoters to be cloned ahead of a *GFP-*  
166 *GUS* reporter gene for subsequent integration into the *Pp108* locus (Thelander *et al.*, 2019).  
167 The resulting construct was verified by sequencing and linearized with *Sfi*I before  
168 transformation into WT moss. Correct integration was confirmed by PCR-verification of 5'  
169 and 3' junctions with the primers SS5/SS742 and SS399/SS307, respectively Fig. S1c,d).  
170 Three independent lines showing correct integration (*PpMSIB::GFPGUS-1,2,3*) were  
171 selected for downstream analysis and were found to display essentially identical reporter  
172 signals in all tissues investigated.

173

174



## 175 **Generation of loss-of-function mutants**

176 Primer sequences are shown in Table S1. *PpMSIA* loss-of-function mutants were generated  
177 by CRISPR technology, and gRNA-expressing constructs were designed using CRISPOR  
178 (Haeussler *et al.*, 2016). For each gRNA used putative off-targets had at least four mismatches  
179 making off-target editing events highly unlikely (Table S3; Modrzejewski *et al.*, 2020). To  
180 produce the plasmids pMLO11 and pMLO12 (Table S3; Fig. S2a), AttB1-PpU6-SgRNAs-  
181 AttB2 fragments produced by gene synthesis (Integrated DNA Technologies, Coralville,  
182 USA) were cloned into the vector pDONR221 by Gateway recombination (Invitrogen,  
183 Carlsbad, USA). To produce plasmid pMLO13 (Table S3; Fig. S2a), the annealing product of  
184 the complementary primers SS743/SS744 was cloned into the vector pENTR\_PpU6\_L1L2  
185 opened with *BsaI* (Mallett *et al.*, 2019). Inserts were confirmed by sequencing. CRISPR  
186 mutants were then obtained as previously described (Lopez-Obando *et al.* 2016). In short, WT  
187 or *msIb-1* (see below) protoplasts were co-transformed with 8 µg of pACT1:hCAS9, 4 µg of  
188 pBNRF, and 4 µg of each of the plasmids pMLO11 and pMLO12 or pMLO13. Transformants  
189 were selected in presence of G418 and mutations were evaluated by PCR amplification and  
190 sequencing of gDNA with the gene specific primers SS745/SS746 and SS745/SS747 (Table  
191 S2; Fig. S2a). For phenotypic analysis, three single (*msIa-1,2,3*) and two double (*msIamsIb-*  
192 *1,2*) mutant lines with mutations in *PpMSIA* likely to block protein function were selected for  
193 phenotypic analysis (Table S2). Independent lines of the same genotype were found to display  
194 essentially identical phenotypes in all tissues examined.

195 *PpMSIB* loss-of-function mutants were generated by homologous recombination, and to  
196 produce the *PpMSIB* knockout construct pVS2 (Fig. S2b), Gateway 3-fragment  
197 recombination technology was used ([www.thermofisher.com](http://www.thermofisher.com)). Thus, LR recombination was  
198 used to fuse a 909 bp *PpMSIB* 5' fragment (amplified with the primers SS734/SS735 and  
199 cloned into the entry vector pDONR P1-P4), a G418 resistance fragment from the entry clone  
200 pDONR4r-3r-G418 (Landberg *et al.*, 2020), and a 1180 bp *PpMSIB* 3' fragment (amplified  
201 with the primers SS736/SS737 and cloned into the entry vector pDONR P3-P2), into the  
202 destination vector pDEST14. The resulting construct was verified by sequencing and was  
203 linearized with *HpaI*/*AvrI* before transformation into WT moss and the selection of stable  
204 transformants in presence of hygomycin. Correct integration was confirmed by PCR-  
205 verification of 5' and 3' junctions with the primers SS58/SS759 and SS762/SS763,  
206 respectively (Fig. S2c). Two independent lines showing correct integration (*msIb-1,2*) were

207 selected for downstream analysis and were found to display essentially identical phenotypes  
208 in all tissues investigated.

## 209 **RT-qPCR**

210 For the analysis of *PpMS1A* and *PpMS1B* expression in various WT tissues, samples from  
211 gametophore apices harvested at different time points after induction, antheridia, archegonia,  
212 and sporophyte samples corresponding to different developmental stages have been  
213 previously described (Landberg *et al.*, 2020; Lopez-Obando *et al.*, 2022). Tissue harvest,  
214 RNA extraction, cDNA synthesis and amplification, setup and cycling of qPCR reactions,  
215 normalization using three reference genes, and calculations have been previously described  
216 (Landberg *et al.*, 2020). The gene-specific primers used were SS586/SS587 for *PpMS1A* and  
217 SS584/SS585 for *PpMS1B* (Table S1). To avoid amplification of genomic DNA  
218 contaminations, the annealing site for one primer in each pair is interrupted by an intron. Melt  
219 curve, gel and standard curve analyses confirmed that both primer pairs amplified a single  
220 product of the expected size with efficiencies close to 100 % (data not shown). Data is  
221 presented as relative expression calculated with the  $2^{-\Delta\Delta CT}$  method. In Fig. 1c-d the sample  
222 with the highest transcript abundance for each gene was set to 1. In Fig. S3a-b, the same data  
223 is presented, but here the sample with the highest overall transcript abundance (regardless of  
224 whether it was *PpMS1A* or *PpMS1B*) was set to 1. Each data point is based on biological  
225 triplicates and error bars represent standard deviations.

## 226 **Sequence retrieval, proteins alignments and phylogenetic analysis**

227 Gene and protein sequences of PHD clade IIa homologs displayed in the phylogenetic tree of  
228 Fig. 1A were retrieved from Phytozome V12.1 and [www.hornworts.uzh.ch](http://www.hornworts.uzh.ch) following  
229 BLAST-based gene identification. For the phylogenetic reconstruction, amino acid sequences  
230 were aligned using the M-Coffee algorithm in T-Coffee (Notredame *et al.*, 2000; Wallace *et al.*,  
231 2006) where after the alignment was filtered using Transitive Consistency Scores (Chang  
232 *et al.*, 2014). The resulting filtered alignment (Fig. S4) was used for phylogenetic  
233 reconstruction in Megax (v.10.1.5; Kumar *et al.*, 2018) with the maximum likelihood method  
234 (JTT amino acid substitution model, gamma distribution among sites) and 500 replications of  
235 bootstrapping. The non-filtered alignment of full length MS1- and MMD1-clade proteins in  
236 Fig. S5 was produced with the MUSCLE algorithm in Megax (v.10.1.5; Kumar *et al.*, 2018).  
237 Alignments in Fig. S4 and S5 were displayed with AliView (Larsson, 2014).



## 238 **GUS staining**

239 Gametophore apices with reproductive organs or sporophytes were harvested as described  
240 above and incubated in GUS solution (50mM NaPO<sub>4</sub>, pH 7.2, 2 mM Fe<sup>2+</sup>+CN, 2 mM  
241 Fe<sup>3+</sup>+CN, 2 mM X-Gluc and 0.2% (v/v) Triton X-100) at room temperature for 48 h. For  
242 analysis of intact organs the tissue was transferred to 70% EtOH and prior to analysis the  
243 organs were mounted on objective glasses in 30 % glycerol. For sectioning, the tissue was  
244 transferred from GUS solution to FGFX fixative (Lopez-Obando *et al.*, 2022) and then treated  
245 as describe below.

## 246 **Sporophyte sectioning**

247 Thin sectioning of sporophytes was carried out as described in Lopez-Obando *et al.* (2022).

## 248 **Microscopy**

249 Intact GUS-stained reproductive organs and sporophytes mounted in 30 % glycerol as well as  
250 Toulidine blue- or GUS-stained sections of mutant and reporter lines were analysed using an  
251 Axioscope A1 microscope equipped with an AxioCam ICc 5 camera and the Zen Blue software  
252 (Zeiss) at 10x, 20x and 63x magnification. Images of mutant antheridia and archegonia  
253 mounted in 30 % glycerol were captured using a DMI4000B microscope with differential  
254 interference contrasts optics at 63x magnification, a DFC360FX camera, and the LAS AF  
255 software (Leica microsystems). For GFP expression analysis, reproductive organs and  
256 developing sporophytes of indicated reporter lines were harvested and mounted in water  
257 immediately prior to analysis. Signals were documented using a LSM 780 confocal laser  
258 scanning microscope (Carl Zeiss) with a GaAsP detector and 20x (NA 0.8) and 63x (NA1.2,  
259 water immersion) objectives. Excitation/detection parameters were 488 nm/491-598 nm for  
260 GFP and 633/647-721 nm for chlorophyll auto-fluorescence. Images were acquired using  
261 ZEN black software and are snapshots of a single focal plane with selected channels overlaid.  
262 Adobe Photoshop CC was used to adjust intensity and contrast, mark borders and cells, cut  
263 away surrounding areas, and merge images to visualize entire large organs at high  
264 magnification. Bar charts, tables, calculation of means, standard deviation and Student t-tests  
265 were performed using Microsoft Excel.

266

## 267 **Results**

### 268 **The emergence of PHD clade IIa transcription factors predated the divergence of** 269 **bryophytes and angiosperms**

270 Genome-wide phylogenetic analyses of angiosperm PHD genes indicate that *AtMS1* and  
271 *AtMMD1* (and its close homolog AT2G01810.1) emerged through a duplication event  
272 predating the evolutionary split into mono- and dicots (Cao *et al.*, 2018). Putative clade IIa  
273 PHD genes also exist in bryophytes even if their phylogenetic position is unknown (Higo *et*  
274 *al.*, 2016; Sanchez-Vera *et al.*, 2022). To change this, we screened genomes from  
275 representatives of land plant lineages for PHD clade IIa genes and subjected deduced amino  
276 acid sequences to phylogenetic analyses. This confirmed the existence of clear PHD clade IIa  
277 genes in all three main lineages of bryophytes, *i.e.* mosses, liverworts, and hornworts. All  
278 three lineages have genes clustering within the angiosperm *MS1*-subclade but lack genes  
279 clustering within the *MMD1*-subclade (Fig. 1a, S4). The liverwort *M. polymorpha* also has a  
280 gene clustering within the subclade of AT1G33420.

281 *PHD* clade IIa genes in bryophytes and angiosperms furthermore share the same exon/intron-  
282 organization and encode proteins with similar domain structure (Fig. 1b). Striking sequence  
283 similarity is evident throughout large parts of the proteins, and is particularly pronounced in  
284 regions demonstrated to be functionally important in angiosperm *MS1* and/or *MMD1*  
285 proteins. Thus, conserved regions include the C-terminal PHD domain, a suggested N-  
286 terminal nuclear localization signal, and the internal MMD domain which in *AtMMD1*  
287 regulates the substrate specificity of the JM16 histone demethylase by a physical interaction  
288 (Fig. 1b, S5; Wilson *et al.*, 2001; Ito and Shinozaki *et al.*, 2002; Reddy *et al.*, 2003; Yang *et*  
289 *al.*, 2003; Wang *et al.*, 2020).

290

291 **Figure 1.**

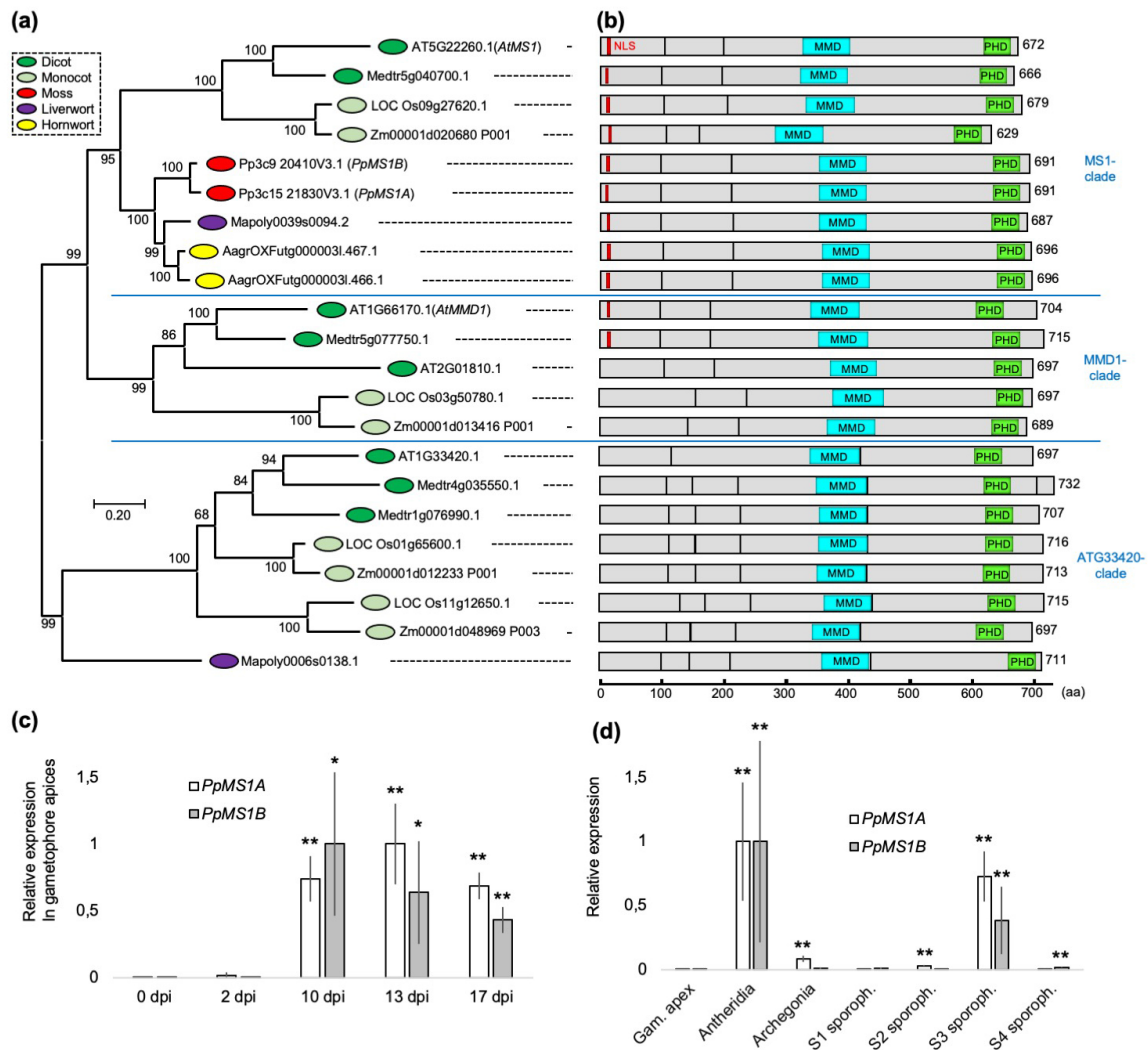

292

293 **Figure 1.** Phylogeny of PHD clade IIa bryophyte homologs and gene expression in the moss *P. patens* in  
 294 sporophytes and reproductive organs. (a) Maximum likelihood tree demonstrating the phylogenetic relation of  
 295 PHD clade IIa-related transcription factors from selected angiosperm and bryophyte species. AT, *Arabidopsis*  
 296 *thaliana*; Medtr, *Medicago truncatula*; LOC Os, *Oriza sativa*; Zm, *Zea mays*; Pp, *Physcomitrium patens*;  
 297 AagrOXF, *Anthoceros agrestis*; Mapoly, *Marchantia polymorpha*. (b) Schematic view of proteins from (a)  
 298 demonstrating exon organization and the positions of conserved domains that have been assigned possible  
 299 functions in flowering plants. Gray box, exon; red box, putative nuclear localization signal consisting of four or  
 300 more basic amino acids; blue box, MMD protein interaction domain; green box, PHD domain. For a full length  
 301 amino acid alignment of proteins belonging to the MS1- and the MMD1-clades with the same domains marked,  
 302 see Fig. S5. (c) Relative transcript abundance of *PpMS1A* and *PpMS1B* in WT gametophore apices at different  
 303 days post induction (dpi) of reproductive development. Typical occurrence of reproductive organs at selected  
 304 time points: 0 and 2 dpi, no reproductive organs; 10 dpi, young antheridia; 13 dpi, mid-stage antheridia and  
 305 young archegonia; 17 dpi, mature antheridia and mid-stage archegonia. (d) Relative transcript abundance of  
 306 *PpMS1A* and *PpMS1B* in isolated WT gametophore shoot apices (without reproductive organs), antheridia  
 307 bundles, archegonia bundles, and sporophytes of different developmental stages. Sporophyte samples contain

308 organs roughly correlating to the following stages described in Lopez-Obando *et al.* (2022): S1, st.1-3; S2, st.4-  
309 8; S3, st.9-11; S4, st.12-14. In both (c) and (d), the sample with the highest transcript abundance for each gene is  
310 set to 1, each data point represents an average of three independent biological replicates, error bars indicate  
311 standard deviation and asterisks indicate a statistically significant difference from gametophore apex sample  
312 prior to reproductive organ formation (Student's t-test: \*,  $P < 0.05$ ; \*\*,  $P < 0.02$ ). See also Figure S3a-b for  
313 presentation of the same data in a way making comparisons of transcript abundance levels between *PpMSIA* and  
314 *PpMSIB* possible.

315

### 316 ***PpMSIA* and *PpMSIB* are expressed in developing sporophytes, as well as in male and** 317 **female reproductive organs**

318 To reveal the function of PHD clade IIa genes in bryophytes, and with hope of gaining insight  
319 about ancestral functions of this gene family in land plants, we have functionally  
320 characterized the two *Physcomitrium patens* clade IIa homologs. Based on their clustering  
321 with genes belonging to the *MSI*-subclade (Fig. 1a), we call the genes *PpMSIA*  
322 (*Pp3c15\_21830V3.1*) and *PpMSIB* (*Pp3c9\_20410V3.1*). As published transcriptome data  
323 indicates that *PpMSIA* and *PpMSIB* are exclusively expressed in the early sporophyte  
324 generation, and in reproductive organs produced by the haploid gametophyte generation  
325 (Sanchez-Vera *et al.*, 2022 and references therein), we first verified this using qPCR. We  
326 checked expression in gametophore (gametophytic shoot) apices at different times post  
327 induction (dpi) of reproductive development (for typical ontogeny, see Landberg *et al.*, 2013).  
328 This revealed a complete lack of expression in apices yet to develop reproductive organs (0, 2  
329 dpi), but clear expression of both genes in apices which had developed reproductive organs  
330 (10, 13, 17 dpi) (Fig. 1c, S3a). Next, we checked expression in isolated antheridia and  
331 archegonia, as well as in isolated sporophytes of different developmental stages. This revealed  
332 significantly increased expression in all three tissue types of at least one of the genes when  
333 compared to vegetative shoot apices (Fig. 1d, S3b). Antheridia showed highly significant  
334 expression of both genes while expression in archegonia was lower and proved significant  
335 only for *PpMSIA*. The relatively low expression in archegonia may be explained by  
336 expression in only a fraction of the cells in the organ, a prospect fitting well with the previous  
337 observation that expression of the two genes is scored in eggs but not in cavity wall cells  
338 (Sanchez-Vera *et al.*, 2022). In sporophytes, transcript abundance of both *PpMSIA* and  
339 *PpMSIB* peaked in the S3 sample, corresponding to developmental stages 9-11 in Lopez-  
340 Obando *et al.* (2022), indicating active expression sometime between completion of

341 embryogenesis and the appearance of mature spores. Finally, even if comparisons of  
342 expression between genes based on qPCR data should be handled with care, our data indicates  
343 that *PpMS1A* is expressed at generally higher levels than *PpMS1B* (Fig. S3a, S3b).

#### 344 **Cell autonomous *PpMS1* activity is essential for developmental progression of** 345 **spermatogenous cells**

346 In the haploid gametophyte generation, all three major lineages of bryophytes produce  
347 flagellated sperms in antheridia (Renzaglia *et al.*, 2000). In *P. patens*, the vegetative shoot  
348 apex is reprogrammed to produce antheridia in response to low temperatures and short day-  
349 length through a stereotypic developmental program (Hohe *et al.*, 2002; Landberg *et al.*,  
350 2013; Hiss *et al.*, 2017; Kofuji *et al.*, 2018). To get a more detailed picture of where and when  
351 during antheridia development the *PpMS1* genes are expressed, we produced translational  
352 reporter lines for *PpMS1A* (*PpMS1Apro::PpMS1A-GFPUS-1,2,3*) and transcriptional  
353 reporter lines for *PpMS1B* (*PpMS1Bpro::GFPUS-1,2,3*) (Materials and Methods; Fig. S1).

354 The translational *PpMS1A* reporter showed signals in antheridial inner cells from stage 3 to 7,  
355 with a peak around stage 5, while no signals were detected in jacket and tip cells (Fig. 2a;  
356 stages defined in Landberg *et al.*, 2013). *PpMS1A* expression is thus restricted to the  
357 spermatogenous cells, comes on as soon as they appear, stays active throughout their division  
358 phase, and fades out at around their entrance into spermatogenesis. In contrast, the  
359 transcriptional *PpMS1B* reporter failed to detect expression in any stage or in any part of  
360 antheridia. This fits well with our qPCR data indicating a significant but manifold lower  
361 expression of *PpMS1B* than of *PpMS1A* in antheridia (Fig. S3a,b).

362 To address the functional relevance of *PpMS1* expression in antheridia, we went on to  
363 produce single and double loss-of-function mutants for the two genes. *PpMS1A* single  
364 mutants (*ms1a-1,2,3*) were produced by CRISPR editing, *PpMS1B* single mutants (*ms1b-1,2*)  
365 were produced by homologous recombination, and double mutants (*ms1ams1b-1,2*) were  
366 produced by CRISPR editing of *PpMS1A* in the *ms1b-1* background (Materials and Methods;  
367 Fig. S2). Although neither single loss-of-function mutant showed obvious deviations in  
368 antheridia development, the male organs of *ms1ams1b* double mutants displayed an arrest of  
369 inner cell development resulting in a complete inability to produce functional sperms (Fig  
370 2b,c). The periclinal divisions in the early antheridium giving rise to the first 4-6 inner cells  
371 appeared unaffected, and the newly formed inner cells typically also divided once, but after



372 this, inner cell divisions ceased in the double mutant. WT inner cells continue to divide on the  
373 expense of cell size during stages 4-6 where after they enter spermatogenesis at stage 7, but  
374 double mutant inner cells instead remained large and kept an appearance similar to the outer  
375 cells from which they first originated. The sterile jacket and tip cells of double mutant  
376 antheridia matured as in WT even if the organ tip failed to open at maturity. This suggests that  
377 jacket and tip cell maturation is independent on successful differentiation of inner cells into  
378 sperms, but that the bursting of organ tips may somehow require the formation of sperms.

379

## 380 Figure 2

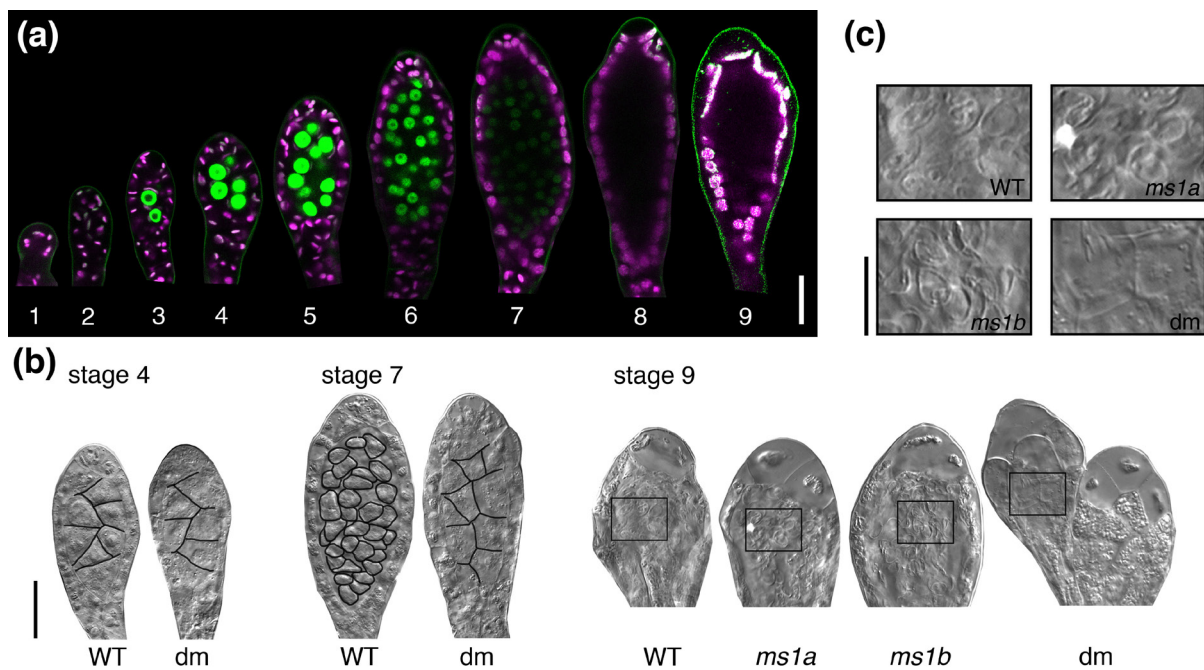

381  
382 **Figure 2.** *PpMSI* functions in antheridia. (a) *PpMSIA::PpMSIA-GFP* and *GFPUS-1* reporter signals in representative  
383 antheridia. A merge of confocal channels detecting green fluorescent protein (green) and chloroplast  
384 autofluorescence (magenta) are shown, and the numbers 1-9 indicate developmental stages according to  
385 Landberg *et al.* (2013). Note expression in spermatogenous inner cells from stage 3 to 7. Bar, 20  $\mu$ m. (b)  
386 Differential interference contrast images of representative stage 4, 7, and 9 antheridia from WT and the  
387 *ms1ams1b-1* double mutant (dm). Note problems with proliferation and differentiation of spermatogenous inner  
388 cells in dm. Stage 9 *ms1a-1* and *ms1b-1* single mutant antheridia are also shown to demonstrate normal sperm  
389 production in these genotypes. Borders between spermatogenous cells have been traced in black for clarity. Bar,  
390 20  $\mu$ m. (c) High magnification of boxed areas in stage 9 organs in (b). Bar, 10  $\mu$ m.

391



392 **Cell autonomous *PpMS1* activity is needed for canal clearance and egg cell maturation**  
393 **in archegonia**

394 *P. patens* female reproductive organs (archegonia) are initiated from a lateral position close to  
395 the gametophore apex a few days after the outgrowth of the first antheridia, and their  
396 development has been described previously (Kofuji *et al.*, 2009; Landberg *et al.*, 2013; 2020).  
397 Signals in archegonia from the translational *PpMS1A* reporter were restricted to the central  
398 cell file, consisting of a basal-most pre-egg/egg, an upper basal cell, and four apical canal  
399 cells (Fig. 3a). The signals indicated relatively strong PpMS1A protein expression in the pre-  
400 egg/egg and the upper basal cell from stage 5 to 7, where after expression in these two cells  
401 declined successively during stage 8 and 9, when the egg matures and the canal cells degrade  
402 (stages defined in Landberg *et al.*, 2013). The reporter also indicated weak PpMS1A  
403 expression in canal cells from stage 6 to 8. As in antheridia, we were unable to detect signals  
404 from the transcriptional *PpMS1B* reporter in archegonia, probably reflecting generally low  
405 expression levels as indicated by our initial qPCR experiments (Fig. 1d, S3d).

406 The phenotypic defects of the *ms1ams1b* archegonia correlates spatially and temporally with  
407 the expression domains of the *PpMS1A* reporter (Fig. 3b). Archegonia from the *ms1ams1b*  
408 double mutant developed normally up until stage 7, by concluding cell divisions in the central  
409 cell file including an asymmetric division of the basal-most cell to produce the egg and the  
410 upper basal cell. However, they consistently failed to complete degradation of the upper basal  
411 cell and canal cells during stage 8, which is required for the formation of an open canal down  
412 to the egg through which sperms can enter when the organ tip opens at stage 9 (Fig. 3b). This  
413 deficiency prevented canal clearance, and is likely to block sperm access to the egg even if the  
414 organ tip opened as in WT during stage 9. We also observed that egg cells in stage 9  
415 *ms1ams1b* archegonia were generally smaller and more compact than in WT (Fig. 3b).

416 While the *ms1b* single mutant produced WT-like archegonia, the female reproductive organs  
417 of the *ms1a* single mutant showed similar but milder deficiencies compared to *ms1ams1b*  
418 organs, with only partially blocked degradation of upper basal and canal cells, and lower  
419 penetrance of abnormal egg cell compaction (Fig. 3b). The fact that phenotypes in the  
420 *ms1ams1b* double mutant is more severe than in the *ms1a* single mutant suggests that  
421 *PpMS1B* contributes to *PpMS1* functions in archegonia, at least in the absence of *PpMS1A*.

422

423 **Figure 3**

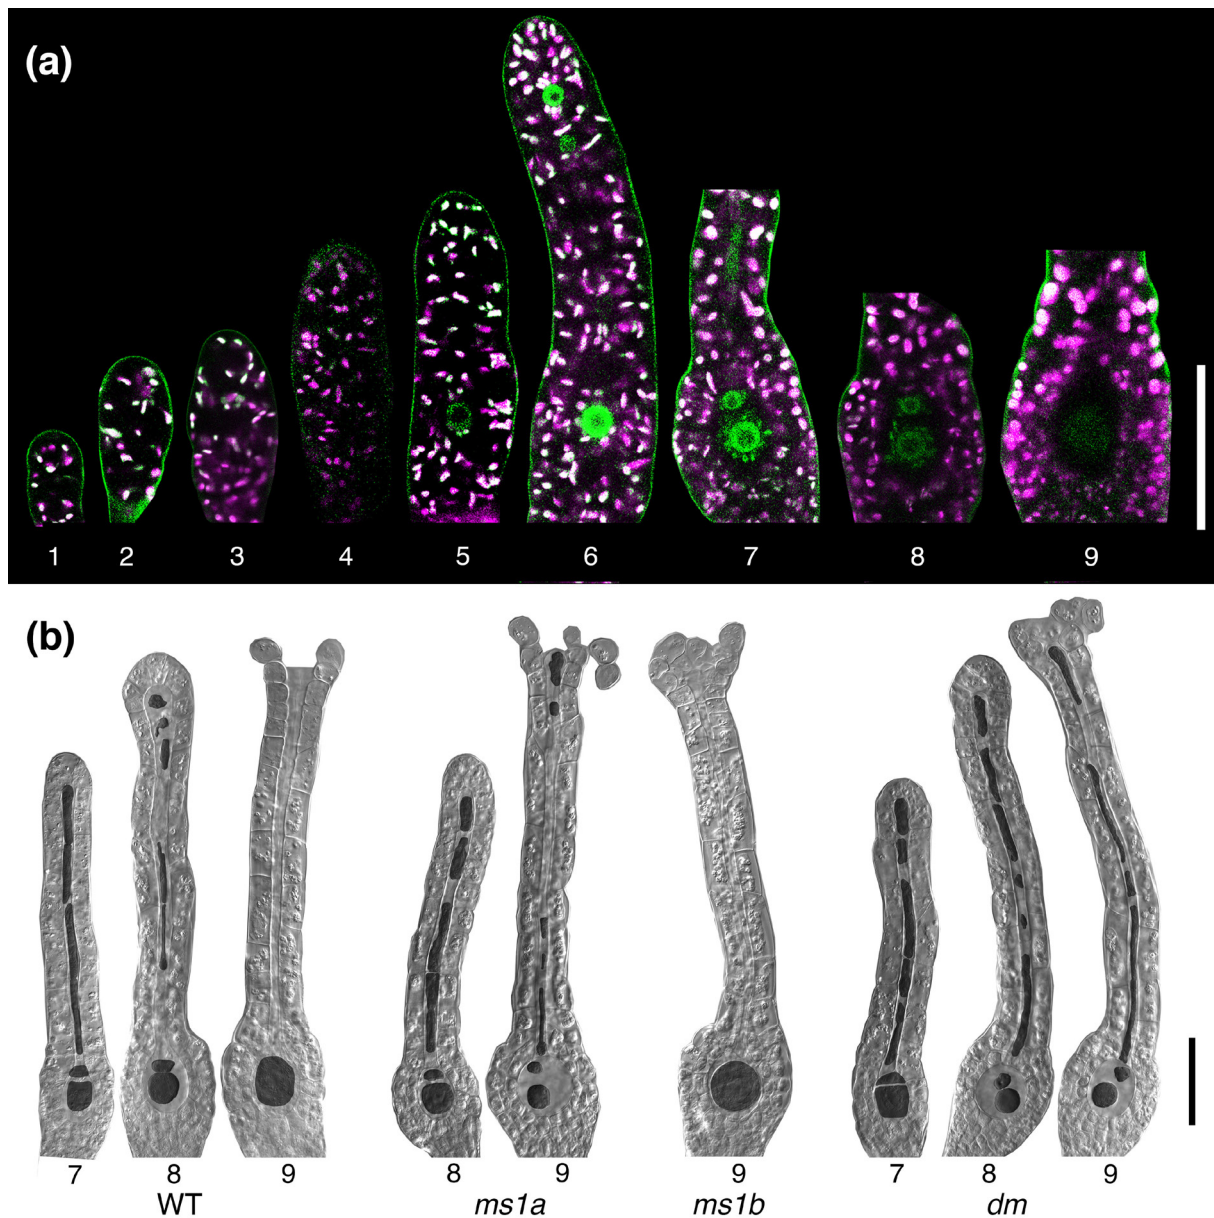

424

425 **Figure 3.** *PpMSI* functions in archegonia. (a) *PpMSIA::PpMSIA-GFP**GUS-1* reporter signals in representative  
426 antheridia. A merge of confocal channels detecting green fluorescent protein (green) and chloroplast  
427 autofluorescence (magenta) are shown, and the numbers 1-9 indicate developmental stages according to  
428 Landberg *et al.* (2013). Note expression in central file of inner cells. Bar, 50  $\mu$ m. (b) Differential interference  
429 contrast images of representative stage 7, 8, and 9 antheridia from WT and the *ms1ams1b-1* double mutant (*dm*).  
430 Note problems with degradation of upper basal cell and canals cells during stage 8 and 9, and the reduced size of  
431 the egg at stage 9 in *dm*. Stage 8 and 9 *ms1a-1* organs, displaying a mild version of the *dm* phenotype, and stage  
432 9 *ms1b-1* single mutant archegonia, displaying no clear phenotype, are also shown. Inner cells have been false  
433 colored in dark grey for clarity. Bar, 50  $\mu$ m.

434

435 ***PpMSI* functions are essential for both male and female fertility**

436 *P. patens* is a monoecious species fully capable of self-fertilization (Perroud *et al.*, 2019). To  
 437 assess the effect of reduced or lost *PpMSI* function on fertility, we next carried out a series of  
 438 crossing experiment. The results confirmed that the *mslams1b* double mutant is completely  
 439 unable to self (Table 1). This was expected since the double mutant cannot produce sperms  
 440 (see above), but crosses also showed that sporophyte production from mutant archegonia  
 441 could not be restored even when the highly fertile Reute WT was used as the sperm donor,  
 442 indicating that the double mutant is both male and female sterile (Table 1).

443 **Table 1.** Fertility of *msl* mutants. Number of shoots that formed sporophytes after selfing or after crosses  
 444 between indicated *msl* mutant line and wild-type (WT) strains Reute (R) or Gransden (Gd).

| Female genotype   | Male genotype     | Number of shoots analysed | Frequency of shoots with initiated sporophyte development (%) |
|-------------------|-------------------|---------------------------|---------------------------------------------------------------|
| R WT              | R WT              | 300                       | 98                                                            |
| Gd WT             | Gd WT             | 448                       | 0,9                                                           |
| Gd WT             | R WT              | 48                        | 71                                                            |
| <i>msla-2</i>     | <i>msla-2</i>     | 233                       | 0,9                                                           |
| Gd WT             | <i>msla-2</i>     | 148                       | 32                                                            |
| <i>msla-2</i>     | R WT              | 248                       | 1,2                                                           |
| <i>msla-3</i>     | <i>msla-3</i>     | 232                       | 1,3                                                           |
| <i>mslams1b-1</i> | <i>mslams1b-1</i> | 456                       | 0                                                             |
| <i>mslams1b-2</i> | <i>mslams1b-2</i> | 357                       | 0                                                             |
| <i>mslams1b-2</i> | R WT              | 387                       | 0                                                             |

445

446 We also explored the fertility of the *msla* single mutant by subjecting it to selfing and crosses  
 447 to both the fertile Reute WT and the largely male sterile Gransden WT (Landberg *et al.*, 2020;  
 448 Meyberg *et al.*, 2020). The crosses showed that the *msla* single mutant can self, albeit at  
 449 much lower frequencies than its parental Reute WT, indicating that the single mutant suffers  
 450 from reduced fertility but is able to produce fertilization competent male and female gametes  
 451 to some extent (Table 1). The much-reduced fertilization frequency could not be restored even  
 452 when the highly fertile Reute WT was used as the sperm donor, indicating that the deficiency  
 453 is mainly due to a female fertility problem (Table 1). This conclusion is partially supported by  
 454 the ability of *msla* single mutant sperms to significantly increase the frequency of sporophyte

455 formation from archegonia of the largely male sterile Gransden WT, demonstrating that *ms1a*  
456 single mutant sperms are largely functional (Table 1).

457 ***PpMS1* expression domains suggests functions in the foot and in sporogenous cells of the**  
458 **sporophyte**

459 *PpMS1A* and *PpMS1B* are also active in mid-stage sporophytes supporting a *PpMS1*-function  
460 also in the diploid generation (Fig 1d, S3b). Like in all bryophytes, the moss zygote develops  
461 into a non-branched sporophyte consisting of a foot and an apical capsule (sporangium) in  
462 which sporogenous cells undergo meiosis to form spores. For an overview of *P. patens*  
463 sporophyte/sporangium ontogeny, including a definition of the developmental stages referred  
464 to below, see Lopez-Obando *et al.* (2022) and references therein.

465 Unfortunately, the *PpMS1* loss-of-function mutants failed to provide clues to the functional  
466 relevance of *PpMS1* expression in sporophytes. As already described, the *ms1ams1b* double  
467 mutant was completely unable to produce sporophytes due to reproductive organ and gamete  
468 deficiencies (Fig. 2,3; Table 1), while the two single mutants produced WT-like sporophytes  
469 (albeit at reduced rates in the *ms1a* mutant) (Fig. 4a). This suggests that the two *PpMS1* genes  
470 have redundant functions during sporophyte development, a prospect supported by the fact  
471 that expression of the two genes in sporophytes shows temporal overlap and is more uniform  
472 in strength than in reproductive organs (Fig 1d, S3b). In addition, the reporter lines also  
473 revealed a spatial overlap of *PpMS1A* and *PpMS1B* expression in two discrete domains during  
474 sporophyte development. While no signals were detected in young embryos, both reporters  
475 were actively expressed in the foot of the slender embryo with an onset at around stage 5 (Fig.  
476 4b, S6). The signals were largely concentrated to the epidermal transfer cells suggested to be  
477 important for nutrient uptake from the gametophore (Regmi & Gaxiola, 2017). Signals from  
478 the translational *PpMS1A* reporter eventually spread from the foot to parts of the seta  
479 connecting the foot to the sporangium, and largely persisted until sporophyte maturity. In  
480 contrast, signals from the transcriptional *PpMS1B* reporter were more restricted to the  
481 sporophyte foot and peaked in strength at around stage 8 where after they faded out.

482 In addition to expression in the sporophyte foot, the two reporters also indicated expression of  
483 *PpMS1A* and *PpMS1B* in the sporogenous cells. Thus, signals from both reporters were  
484 evident in the sole sporogenous cell layer from early stage 9, *i.e.* immediately following  
485 completion of the cell division phase giving rise to the different cell layers of the sporangium



486 (Fig. 4b-d, S6). The signals in the sporogenous cells persisted during their final division at  
487 stage 10 and their maturation into liberated globular sporocytes at stage 11, where after the  
488 signals started to fade out before meiosis and spore formation at stage 12 (Fig. 4c,d, S6).  
489 Signals from the translational *PpMS1A* reporter peaked at stage 9-10 and were completely lost  
490 around meiosis at stage 12 (Fig. 4c,d). Signals from the transcriptional *PpMS1B* reporter  
491 peaked at stage 10-11, dropped in intensity at around meiosis at stage 12, but were often  
492 weakly evident as late as in mature spores (Fig. 4c,d, S6). Signals from the two reporters were  
493 generally evident only in the sporogenous cells, but we came across a few examples of stage 9  
494 sporophytes where the *PpMS1A* reporter showed weak putative signals also in the tapetum  
495 and columella layers, opening for the possibility that *PpMS1* activity could play a role also in  
496 these cells during a brief developmental window (Fig. 4c,d).

497 **Figure 4**

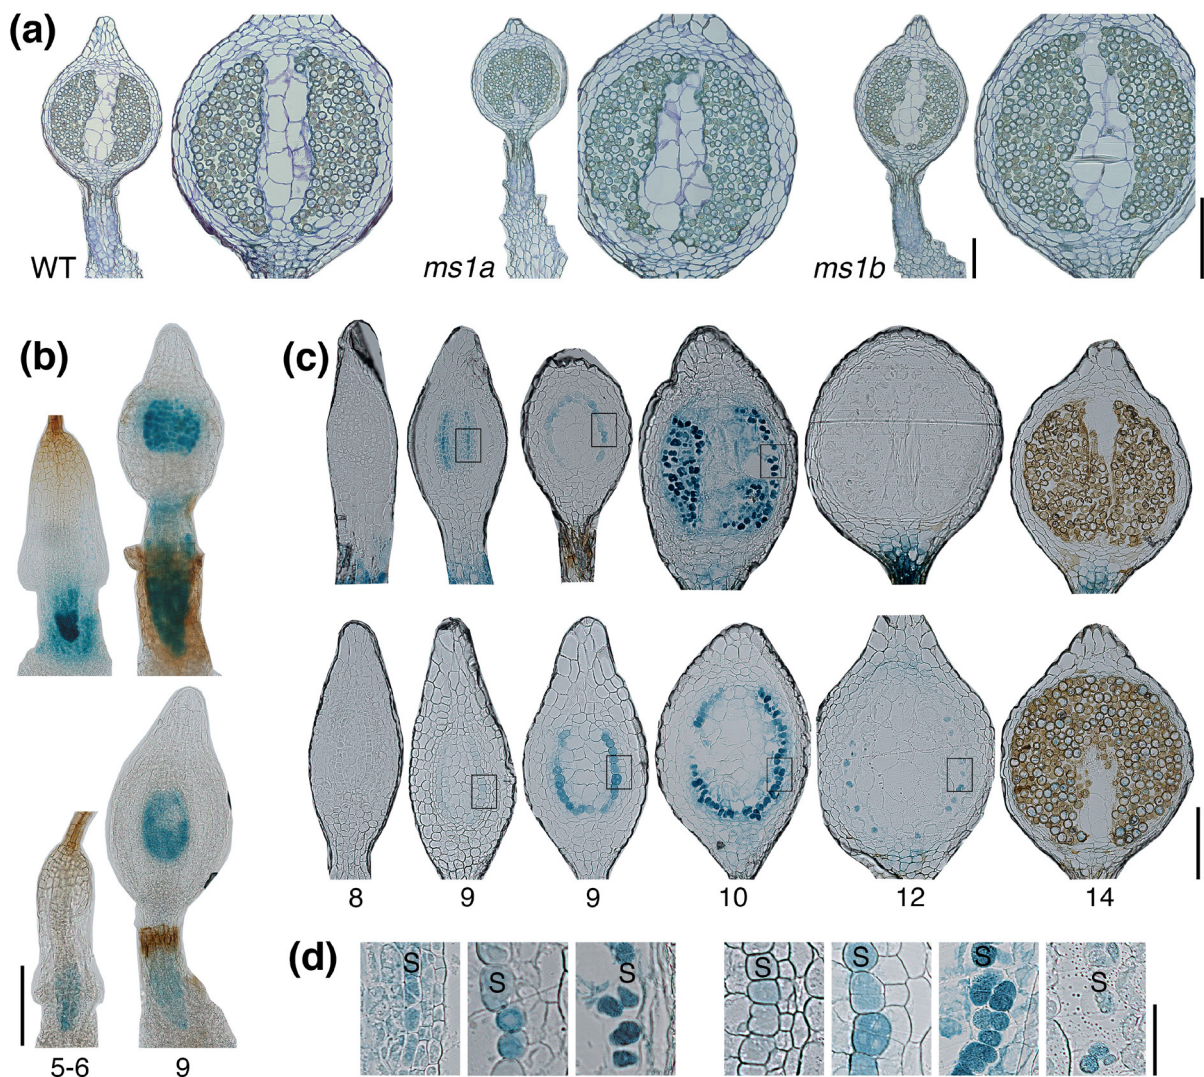

498

499 **Figure 4.** *PpMSI* activity in sporophytes. (a) Medial longitudinal sections through WT, *ms1a-2*, *ms1b-1* stage 14  
500 sporophytes to demonstrate the lack of phenotypes in *ms1* single mutants. For each genotype, an entire  
501 sporophyte is shown to the left and a magnification of a sporangium to the right. (b-d) *PpMSIA::PpMSIA-*  
502 *GFPGUS-1* and *PpMSIB::GFPGUS-1* GUS reporter signals in sporophytes. (b) Whole-mounted stage 5-6 and 9  
503 GUS-stained sporophytes of the *PpMSIA::PpMSIA-GFPGUS-1* (upper) and the *PpMSIB::GFPGUS-1* (lower)  
504 reporter lines. Note early signals in sporophyte foot and later signals central part of sporangium. (c) Sections of  
505 stage 8, 9, 10, 12 and 14 GUS-stained sporangia of the *PpMSIA::PpMSIA-GFPGUS-1* (upper) and the  
506 *PpMSIB::GFPGUS-1* (lower) reporter lines. Note that signals largely restricted to the sporogenous cell layer  
507 comes on at stage 9. (d) High magnification of boxed areas in C. *PpMSIA::PpMSIA-GFPGUS-1* signals (left)  
508 are largely restricted to the sporogenous cell layer (S) even if a putative signal is evident also in the surrounding  
509 cells at early stage 9. *PpMSIB::GFPGUS-1* signals are restricted to the sporogenous cell layer (S) from the onset  
510 at stage 9. Numbers in (b) and (c) indicate developmental stages according to Lopez-Obando *et al.* (2022). See  
511 also Fig. S6 for *PpMSIB::GFPGUS-1* GFP reporter signals in sporophytes. Size bars in (a-c), 200  $\mu$ m. Size bar  
512 in (d), 50  $\mu$ m.

## 513 Discussion

514 This study reveals that PHD clade IIa genes in moss control developmental processes in  
515 antheridia, archegonia and likely in sporophytes. *PpMSI* activity is absolutely essential both  
516 for male and female fertility, and fundamental features of how it affects the development of  
517 antheridia and archegonia are shared. *PpMSI* activity thus appears dispensable for the  
518 initiation of the two organ types, the development of their sterile structural parts, and the  
519 inwards formative divisions giving rise to the gamete-producing inner cell population.  
520 Instead, cell autonomous *PpMSI* activity is needed for the specification and further  
521 development of these inner cells. In antheridia, *PpMSI* controls the proliferation and  
522 differentiation of inner cells into sperms. In archegonia, *PpMSI* is needed for proper  
523 maturation of the egg, and for degradation of the remaining inner cells to leave a free canal  
524 passage for sperms to access the egg.

525 The reporter genes indicate that *PpMSIA* and *PpMSIB* have functions also in the diploid  
526 sporophyte generation. Their expression domains suggests that *PpMSI* activity is dispensable  
527 for early embryo development but is likely to have functions in transfer cells of the  
528 sporophyte foot and in the developing sporangium. In the sporangium, the *PpMSI* genes are  
529 primarily expressed in the sporogenous cell layer soon after its establishment, supporting a  
530 possible function of *PpMSI* activity for the specification of these cells. In angiosperms, MS1  
531 and MMD1 are part of a complex gene regulatory network facilitating tapetum-mediated  
532 pollen development (Ferguson *et al.*, 2017; Lei & Liu, 2020). Among other factors, this



533 network also includes bHLH clade II and III(a+c) genes. The PpMS1 expression pattern in  
534 moss sporophytes, combined with that of PpbHLH clade II and III(a+c) genes (Lopez-Obando  
535 *et al.*, 2022), support that moss sporogenesis could be regulated by a homologous network  
536 inherited from the common ancestor of land plants.

537 Our finding that *PpMS1A* and *PpMS1B* provide functions in sporophytes as well as during  
538 male and female gametogenesis, while function of their angiosperm homologs is restricted to  
539 processes finally leading to completion of male gametogenesis only, raises questions about  
540 what the original PHD clade IIa function in the ancestors of all extant land plants may have  
541 been. We speculate that the functions in antheridia, archegonia and sporophytes of mosses  
542 today all may originate from one and the same function in a hypothetical ancestral plant, with  
543 morphologically similar gametes (isogamy) and a haplontic life cycle where the zygote  
544 underwent meiosis without intervening mitotic divisions. Thus, we hypothesize that PHD  
545 clade IIa activity served to specify the two gametes, where after it was carried over via  
546 fertilization to the zygote, in which it secured expression of genes needed both for nutrient  
547 uptake from the gametophyte generation and for meiosis. Later during evolution, when  
548 mitotic divisions of the zygote morphologically separated the cells destined for meiosis from  
549 the cells carrying over nutrients from the gametophyte, this was accompanied by a similar  
550 spatiotemporal separation of clade IIa activity.

551 To challenge this speculative hypothesis, it would be highly interesting to investigate the  
552 expression pattern and function of possible PHD clade IIa homologs in the algal sisters of  
553 land plants (Ito *et al.*, 2007). Using a recent transcriptome study (Sanchez-Vera *et al.*, 2022),  
554 we in fact identified 135 additional moss genes with significantly higher expression in egg  
555 cells, antheridia and the diploid sporophyte generation at the green stage when sporogenesis  
556 occur, compared to vegetative haploid tissues (Table S4). They thus have the potential to play  
557 specific roles in both gametogenesis and sporogenesis. Possibly, the hypothetical evolutionary  
558 history outlined for clade IIa genes could be shared also with these genes. They include the  
559 two *PpBNB* genes encoding class VIIIa bHLH transcription factors. While the Arabidopsis  
560 *BNB* genes are required only for specification of male generative cells, the *Marchantia*  
561 *polymorpha* homologs are essential for the initiation of both male and female reproductive  
562 organs, and are active in egg and sperm progenitors (Yamaoka *et al.*, 2018; Hisanaga *et al.*,  
563 2019). In *P. patens*, *BNB*'s are important for both male and female germ cell specification,  
564 making it difficult to assess their potential role in the green sporophyte, where it is also

565 expressed (Sanchez-Vera *et al.*, 2022). A moss gene, *PpMKN1*, encoding a class 2  
566 KNOTTED1-LIKE HOMEODOMAIN (KNOX2) transcription factor preventing haploid-specific  
567 development in the sporophyte phase (Sakakibara *et al.*, 2013) is also significantly up-  
568 regulated in the egg and antheridia, although at a much-reduced level compared to the green  
569 sporophyte. Additional transcription factor genes, such as homologs to Arabidopsis *WRI2*,  
570 *LEC2*, *EFM*, *NAC56*, are also up-regulated in all three reproductive tissue types, but their  
571 functions in moss are unknown and not easy to extrapolate from their functions in  
572 Arabidopsis. A homolog to CCR4-NOT complex component NOT1, which in Arabidopsis  
573 regulates RNA-directed methylation and transcriptional silencing (Zhou *et al.*, 2020), is also  
574 elevated in the reproductive organs and the green sporophytes. AtNOT1 is necessary for e.g.  
575 proper male germ cell development, pollen germination and embryogenesis (Motomura *et al.*,  
576 2020; Pereira *et al.*, 2020). A moss homolog of MBD9, a SWR1-C interacting protein  
577 required for H2A.Z deposition at a subset of actively transcribing genes in Arabidopsis (Potok  
578 *et al.*, 2019; Luo *et al.*, 2020), also show elevated expression in the three selected tissue types.

579 Assuming that the need for PHD clade IIa functions in moss to complete male and female  
580 gametogenesis as well as sporogenesis represent a heritage from ancestral land plants, one can  
581 ask how this has evolved into the clade IIa-regulation in anthers evident in angiosperms. It  
582 appears very likely that this can be attributed to the loss of gametangia as part of a dramatic  
583 reduction of the gametophyte generation in angiosperms (Hisanaga *et al.*, 2019). Thus, the  
584 need for clade IIa-functions during gametogenesis may either have been lost, or at least  
585 become difficult to separate from sporophytic functions facilitating meiosis, as the two  
586 processes have become so intimately coupled in time and space in angiosperms.

587 The possible homology between clade IIa functions in angiosperm anthers and moss  
588 sporangia is complicated by the fact that Arabidopsis *AtMS1* and *AtMMD1* exert their  
589 functions in distinct anther cell types. Thus, *AtMMD1* controls gene expression and  
590 chromosome condensation in microsporocytes (Yang *et al.*, 2003; Reddy *et al.*, 2003) while  
591 *AtMS1* controls gene expression in tapetal cells (Wilson *et al.*, 2001; Ito & Shinozaki, 2002;  
592 Alves-Ferreira *et al.*, 2007; Yang *et al.*, 2007; Reimegård *et al.*, 2017; Lu *et al.*, 2020). Our  
593 phylogenetic analysis reveals that bryophyte clade IIa homologs cluster with angiosperm MS1  
594 proteins rather than with MMD1 proteins. While this could indicate that the duplication event  
595 giving rise to *MS1* and *MMD1* took place already in the common ancestors of all extant land  
596 plants but that *MMD1* homologs have been lost in non-seed plant lineages through the course

597 of evolution, we find it equally likely that the duplication event took place in the angiosperm  
598 lineage after its divergence from bryophytes where after MMD1-clade genes diversified by  
599 neo- or sub-functionalization.

600 Even if the current study does not address the molecular basis of *PpMSI* activity, the  
601 conservation of key protein domains like the N-terminal nuclear localization signal, the  
602 central MMD domain, and the C-terminal PHD domain supports that also bryophyte PHD  
603 clade IIa proteins functions by controlling cell identity through the regulation of chromatin  
604 structure and gene expression (Andreuzza *et al.*, 2015; Reimergård *et al.*, 2017; Wang *et al.*,  
605 2020). Future studies will have to reveal if this is indeed the case, and to what extent related  
606 genes and gene clusters are targeted by clade IIa-regulation in the angiosperm anther and in  
607 the reproductive organs and the sporophyte of moss.

## 608 **Acknowledgments**

609 We thank Ulf Lagercrantz for help with bioinformatics analyses on which Table S4 is based  
610 on. This work was supported by grants from the Swedish Research Council to ES and MT  
611 (621-2014-4941; 2018-04068) and the Nilsson-Ehle Endowments to KL and MLO.

## 612 **Author contributions**

613 KL, MLO, VSV and MT conducted the experimental work and analyzed the data. MLO, KL,  
614 ES and MT designed experiments and interpreted data. MT, ES and KL wrote the manuscript.

## 615 **Data availability**

616 The data that support the findings of this study are available from the corresponding author  
617 upon request.

## 618 **References**

- 619 **Alves-Ferreira M, Wellmer F, Banhara A, Kumar V, Riechmann JL, Meyerowitz EM.**  
620 **2007.** Global Expression Profiling Applied to the Analysis of Arabidopsis Stamen  
621 Development. *Plant Physiology* **145**:747–762.
- 622 **Andreuzza S, Nishal B, Singh A, Siddiqi I. 2015.** The Chromatin Protein DUET/MMD1  
623 Controls Expression of the Meiotic Gene TDM1 during Male Meiosis in Arabidopsis. **PLoS**  
624 **Genet** **11**:e1005396.

- 625 **Berger F, Twell D. 2011.** Germline specification and function in plants. *Annu Rev Plant Biol*  
626 **62:461-484.**
- 627 **Cao Y, Han Y, Meng D, Abdullah M, Li D, Jin Q, Lin Y, Cai Y. 2018.** Systematic analysis  
628 and comparison of the PHD-Finger gene family in Chinese pear (*Pyrus bretschneideri*) and its  
629 role in fruit development. *Funct Integr Genomics* **18:519-531.**
- 630 **Chang J-M, Di Tommaso P, Notredame C. 2014.** TCS: a new multiple sequence alignment  
631 reliability measure to estimate alignment accuracy and improve phylogenetic tree  
632 reconstruction. *Molecular Biology and Evolution* **31: 1625–1637.**
- 633 **Ferguson AC, Pearce S, Band LR, Yang C, Ferjentsikova I, King J, Yuan Z, Zhang D,**  
634 **Wilson ZA. 2017.** Biphasic regulation of the transcription factor  
635 ABORTEDMICROSPORES (AMS) is essential for tapetum and pollen development in  
636 Arabidopsis. *New Phytologist* **213:778–790.**
- 637 **Hackenberg D, Twell D. 2019.** The evolution and patterning of male gametophyte  
638 development. *Current Topics in Developmental Biology* **131:257-298.**
- 639 **Haeussler M, Schönig K, Eckert H, Eschstruth A, Mianné J, Renaud JB, Schneider-**  
640 **Maunoury S, Shkumatava A, Teboul L, Kent J et al. 2016.** Evaluation of off-target and on-  
641 target scoring algorithms and integration into the guide RNA selection tool CRISPOR.  
642 *Genome Biol.* **17:148.**
- 643 **Harrison CJ. 2017.** Development and genetics in the evolution of land plant body plans. *Phil*  
644 *Trans R Soc Lond B Biol Sci* **372:20150490.**
- 645 **Higo A, Niwa M, Yamato KT, Yamada L, Sawada H, Sakamoto T, Kurata T, Shirakawa**  
646 **M, Endo M, Shigenobu S et al. 2016.** Transcriptional framework of male gametogenesis in  
647 the liverwort *Marchantia polymorpha* L. *Plant and Cell Physiology* **57:325-338.**
- 648 **Hisanaga T, Yamaoka S, Kawashima T, Higo A, Nakajima K, Araki T, Kohchi T,**  
649 **Berger F. 2019.** Building new insights in plant gametogenesis from an evolutionary  
650 perspective. *Nature Plants* **5:663–669.**
- 651 **Hiss M, Meyberg R, Westermann J, Haas FB, Schneider L, Schallenberg-Rudinger M,**  
652 **Ullrich KK, Rensing SA. 2017.** Sexual reproduction, sporophyte development and molecular

- 653 variation in the model moss *Physcomitrella patens*: introducing the ecotype Reute. *Plant*  
654 *Journal* **90**:606-620.
- 655 **Hohe A, Rensing SA, Mildner M, Lang D, Reski R. 2002.** Day length and temperature  
656 strongly influence sexual reproduction and expression of a novel MADS-box gene in the moss  
657 *Physcomitrella patens*. *Plant Biol* **4**:595–602.
- 658 **Ito T, Shinozaki K. 2002.** The MALE STERILITY1 Gene of Arabidopsis, Encoding a  
659 Nuclear Protein with a PHD-finger Motif, is Expressed in Tapetal Cells and is Required for  
660 Pollen Maturation. *Plant Cell Physiol.* **43**:1285–1292.
- 661 **Ito T, Nagata N, Yoshiba Y, Ohme-Takagi M, Ma H, Shinozaki K. 2007.**  
662 Arabidopsis MALE STERILITY1 encodes a PHD-type transcription factor and  
663 regulates pollen and tapetum development. *Plant Cell* **19**:3549-62.
- 664 **Kofuji R, Yoshimura T, Inoue H, Sakakibara K, Hiwatashi Y, Kurata T, Aoyama T,**  
665 **Ueda K, Hasebe M. 2009.** Gametangia development in the moss *Physcomitrella patens*.  
666 *Annual Plant Reviews* **36**: 167–181.
- 667 **Kofuji R, Yagita Y, Murata T, Hasebe M. 2018.** Antheridial development in the moss  
668 *Physcomitrella patens*: implications for understanding stem cells in mosses. *Phil Trans R Soc*  
669 *B* **373**:20160494.
- 670 **Kumar S, Stecher G, Li M, Knyaz C, Tamura K. 2018.** MEGA X: Molecular evolutionary  
671 genetics analysis across computing platforms. *Molecular Biology and Evolution* **35**:1547-  
672 1549.
- 673 **Larsson A. 2014.** AliView: a fast and lightweight alignment viewer and editor for large data  
674 sets. *Bioinformatics* **30**:3276-3278.
- 675 **Landberg K, Pederson ERA, Viaene T, Bozorg B, Friml J, Jönsson H, Thelander**  
676 **M, Sundberg E. 2013.** The moss *Physcomitrella patens* reproductive organ development is  
677 highly organized, affected by the two SHI/STY genes and by the level of active auxin in  
678 the SHI/STY expression domain. *Plant Physiology* **162**:1406-1419.

- 679 **Landberg K, Šimura J, Ljung K, Sundberg E, Thelander M. 2020.** Studies of moss  
680 reproductive development indicate that auxin biosynthesis in apical stem cells may constitute  
681 an ancestral function for focal growth control. *New Phytologist* **229**:845– 860.
- 682 **Lei X, Liu B. 2020.** Tapetum-Dependent Male Meiosis Progression in Plants: Increasing  
683 Evidence Emerges. *Front. Plant Sci.* **10**: 1667.
- 684 **Lopez-Obando M, Hoffmann B, Géry C, Guyon-Debast A, Téoulé E, Rameau C,**  
685 **Bonhomme S, Nogué F. 2016.** Simple and Efficient Targeting of Multiple Genes Through  
686 CRISPR-Cas9 in *Physcomitrella patens*. (G3 Bethesda) **6**:3647-3653.
- 687 **Lopez-Obando M, Landberg K, Sundberg E, Thelander M. 2022.** Dependence on clade II  
688 bHLH transcription factors for nursing of haploid products by tapetal-like cells is conserved  
689 between moss sporangia and angiosperm anthers. *New Phytol* doi: 10.1111/nph.17972. Online  
690 ahead of print.
- 691 **Luo YX, Hou XM, Zhang CJ, Tan LM, Shao CR, Lin RN, Su YN, Cai XW, Li L, Chen**  
692 **S, He XJ. 2020.** A plant-specific SWR1 chromatin-remodeling complex couples histone  
693 H2A.Z deposition with nucleosome sliding. *EMBO J.* **39**:e102008.
- 694 **Lu JY, Xiong SX, Yin W, Teng XD, Lou Y, Zhu J, Zhang C, Gu JN, Wilson ZA, Yang**  
695 **ZN. 2020.** MS1, a direct target of MS188, regulates the expression of key sporophytic pollen  
696 coat protein genes in Arabidopsis. *Journal of Experimental Botany* **71**:4877-4889.
- 697 **Mallett DR, Chang M, Cheng X, Bezanilla M. 2019.** Efficient and modular CRISPR-Cas9  
698 vector system for *Physcomitrella patens*. *Plant Direct* **3**:e00168.
- 699 **Meyberg R, Perroud PF, Haas FB, Schneider L, Heimerl T, Renzaglia KS, Rensing SA.**  
700 **2020.** Characterisation of evolutionary conserved key players affecting eukaryotic flagellar  
701 motility and fertility using a moss model. *New Phytologist* **227**:440-454.
- 702 **Modrzejewski D, Hartung F, Lehnert H, Sprink T, Kohl C, Keilwagen J, Wilhelm R.**  
703 **2020.** Which Factors Affect the Occurrence of Off-Target Effects Caused by the Use of  
704 CRISPR/Cas: A Systematic Review in Plants. *Frontiers in Plant Science* **11**:574959.



- 705 **Morris JL, Puttick MN, Clark JW, Edwards D, Kenrick P, Pressel S, Wellman CH,**  
706 **Yang Z, Schneidera H, Donoghue PCJ. 2018.** The timescale of early land plant evolution.  
707 *Proceedings of the National Academy of Sciences USA* **115**:E2274–2283.
- 708 **Motomura K, Arae T, Araki-Uramoto H, Suzuki Y, Takeuchi H, Suzuki T, Ichihashi Y,**  
709 **Shibata A, Shirasu K, Takeda A, Higashiyama T, Chiba Y. 2020.** AtNOT1 Is a Novel  
710 Regulator of Gene Expression during Pollen Development. *Plant Cell Physiol.* **61**:712-721.
- 711 **Mouriz A, López-González L, Jarillo JA, Piñeiro M. 2015.** PHDs govern plant  
712 development. *Plant Signaling & Behavior* **10**:e993253.
- 713 **Notredame C, Higgins DG, Heringa J. 2000.** T-Coffee: a novel method for fast and accurate  
714 multiple sequence alignment. *Journal of Molecular Biology* **302**:205-217.
- 715 **Pereira PA, Boavida LC, Santos MR, Becker JD. 2020.** AtNOT1 is required for  
716 gametophyte development in Arabidopsis. *Plant J.* **103**:1289-1303.
- 717 **Perroud PF, Haas FB, Hiss M, Ullrich KK, Alboresi A, Amirebrahimi M, Barry K,**  
718 **Bassi R, Bonhomme S, Chen H et al. 2018.** The *Physcomitrella patens* gene atlas project:  
719 large-scale RNA-seq based expression data. *Plant Journal* **95**:168-182.
- 720 **Perroud P-F, Meyberg R, Rensing SA. 2019.** *Physcomitrella patens* Reute mCherry as a  
721 tool for efficient crossing within and between ecotypes. *Plant Biol (Stuttg) Suppl* **1**:143-149.
- 722 **Potok, ME, Wang, Y, Xu, L et al. 2019.** Arabidopsis SWR1-associated protein methyl-CpG-  
723 binding domain 9 is required for histone H2A.Z deposition. *Nat Commun* **10**:3352.
- 724 **Reddy TV, Kaur J, Agashe B, Sundaresan V, Siddiqi I. 2003.** The DUET gene is  
725 necessary for chromosome organization and progression during male meiosis in Arabidopsis  
726 and encodes a PHD finger protein. *Development* **130**:5975-5987.
- 727 **Reimegård J, Kundu S, Pendle A, Irish VF, Shaw P, Nakayama N, Sundström JF,**  
728 **Emanuelsson O. 2017.** Genome-wide identification of physically clustered genes suggests  
729 chromatin-level co-regulation in male reproductive development in *Arabidopsis thaliana*.  
730 *Nucleic Acids Research* **45**:3253-3265.

- 731 **Renzaglia KS, Duff RJ, Nickrent DL, Garbary DJ. 2000.** Vegetative and reproductive  
732 innovations of early land plants: implications for a unified phylogeny. *Phil Trans R Soc Lond*  
733 *B* **355**:769-793.
- 734 **Regmi KC, Gaxiola RA. 2017.** Alternate modes of photosynthate transport in the alternating  
735 generations of *Physcomitrella patens*. *Frontiers in Plant Science* **8**:1956.
- 736 **Sakakibara K, Ando S, Yip HK, Tamada Y, Hiwatashi Y, Murata T, Deguchi H, Hasebe**  
737 **M, Bowman JL. 2013.** KNOX2 genes regulate the haploid-to-diploid morphological  
738 transition in land plants. *Science* **339**:1067-70.
- 739 **Sanchez-Vera V, Landberg K, Lopez-Obando M, Thelander M, Lagercrantz U, Muñoz-**  
740 **Viana R, Schmidt A, Grossniklaus U, Sundberg E. 2022.** The *Physcomitrium patens* egg  
741 cell expresses several distinct epigenetic components and utilizes homologues of BONOBO  
742 genes for cell specification. *New Phytol.* **233**:2614-2628.
- 743 **Schaefer D, Zrýd J-P, Knight CD, Cove DJ. 1991.** Stable transformation of the moss  
744 *Physcomitrella patens*. *Molecular and General Genetics* **226**:418-424.
- 745 **Thelander M, Nilsson A, Olsson T, Johansson M, Girod PA, Schaefer DG, Zryd JP,**  
746 **Ronne H. 2007.** The moss genes PpSKI1 and PpSKI2 encode nuclear SnRK1 interacting  
747 proteins with homologues in vascular plants. *Plant Molecular Biology* **64**:559–573.
- 748 **Thelander M, Landberg K, Sundberg E. 2019.** Minimal auxin sensing levels in vegetative  
749 moss stem cells revealed by a ratiometric reporter. *New Phytologist* **224**:775-788.
- 750 **Yamaoka S, Nishihama R, Yoshitake Y, Ishida S, Inoue K, Saito M, Okahashi K, Bao H,**  
751 **Nishida H, Yamaguchi K, Shigenobu S, Ishizaki K, Yamato KT, Kohchi T. 2018.**  
752 Generative Cell Specification Requires Transcription Factors Evolutionarily Conserved in  
753 Land Plants. *Current Biology* **28**:479–486.
- 754 **Wallace IM, O’Sullivan O, Higgins DG, Notredame C. 2006.** M-Coffee: combining  
755 multiple sequence alignment methods with T-Coffee. *Nucleic Acids Research* **34**:1692–1699.
- 756 **Wang J, Niu B, Huang J, Wang H, Yang X, Dong A, Makaroff C, Ma H, Wang Y.**  
757 **2016.** The PHD Finger Protein MMD1/DUET Ensures the Progression of Male Meiotic

758 Chromosome Condensation and Directly Regulates the Expression of the Condensin Gene  
759 CAP-D3. *The Plant Cell* **28**:1894–1909.

760 **Wang J, Yu C, Zhang S, Ye J, Dai H, Wang H, Huang J, Cao X, Ma J, Ma H, Wang Y.**  
761 **2020.** Cell-type-dependent histone demethylase specificity promotes meiotic chromosome  
762 condensation in Arabidopsis. *Nature Plants* **6**:823–837.

763 **Wilson ZA, Morroll SM, Dawson J, Swarup R, Tighe PJ. 2001.** The Arabidopsis MALE  
764 STERILITY1 MS1. gene is a transcriptional regulator of male gametogenesis, with  
765 homology to the PHD-finger family of transcription factors. *Plant J* **28**:27-39.

766 **Yang X, Makaroff CA, Ma H. 2003.** The Arabidopsis MALE MEIOCYTE DEATH1 gene  
767 encodes a PHD-finger protein that is required for male meiosis. *Plant Cell* **15**:1281-95.

768 **Yang C, Vizcay-Barrena G, Conner K, Wilson ZA. 2007.** MALE STERILITY1 is required  
769 for tapetal development and pollen wall biosynthesis. *Plant Cell* **19**:3530-3548.

770 **Zhou HR, Lin RN, Huang HW, Li L, Cai T, Zhu JK, Chen S, He XJ. 2020.** The CCR4-  
771 NOT complex component NOT1 regulates RNA-directed DNA methylation and  
772 transcriptional silencing by facilitating Pol IV-dependent siRNA production. *Plant J.*  
773 **103**:1503-1515.

## 774 **Supporting Information**

775 Additional Supporting Information may be found online in the Supporting Information tab for  
776 this article:

777 **Figure S1** Overviews of how reporter lines were generated.

778 **Figure S2** Overviews of how *PpMS1A* and *PpMS1B* loss-of-function mutants were generated.

779 **Figure S3** Data from main figure 1c-d presented in a way making comparisons of transcript  
780 abundance between the two genes possible.

781 **Figure S4** Amino acid sequence alignment used to infer phylogenetic tree in Fig. 1.

782 **Figure S5** Non-filtered full length alignment of all proteins in Fig. 1 belonging to the MS1-  
783 and MMD1-clades.

784 **Figure S6** Confocal microscopy images showing *PpMS1B::GFPGUS-1* GFP reporter signals  
785 in sporophytes.

786 **Table S1** Primers used in this study.

787 **Table S2** Characteristics of knock-out and knock-in lines obtained by CRISPR-CAS9 gene  
788 editing.

789 **Table S3** Characteristics of crRNAs in gRNA-expressing plasmids.

790 **Table S4** *P. patens* genes for which publically available RNA-seq data indicates higher  
791 expression in green sporophytes, eggs and antheridia, respectively, than in vegetative tissue  
792 samles. – see separate excel file
